# Supplementary material for: The peptide symporter SLC15a4 is essential for the development of systemic lupus erythematosus in murine models
Source: PubMed Central journal article supplement (PMC7808665; doi:10.1371/journal.pone.0244439), 2021-01-14
Supplement: pone.0244439.s006.pdf [file pone.0244439.s006.pdf]

slc15a4<sup>+/+</sup>

slc15a4<sup>-/-</sup>

p-IRAK4

M 0' 15' 30' 60' 120' 0' 15' 30' 60' 120'

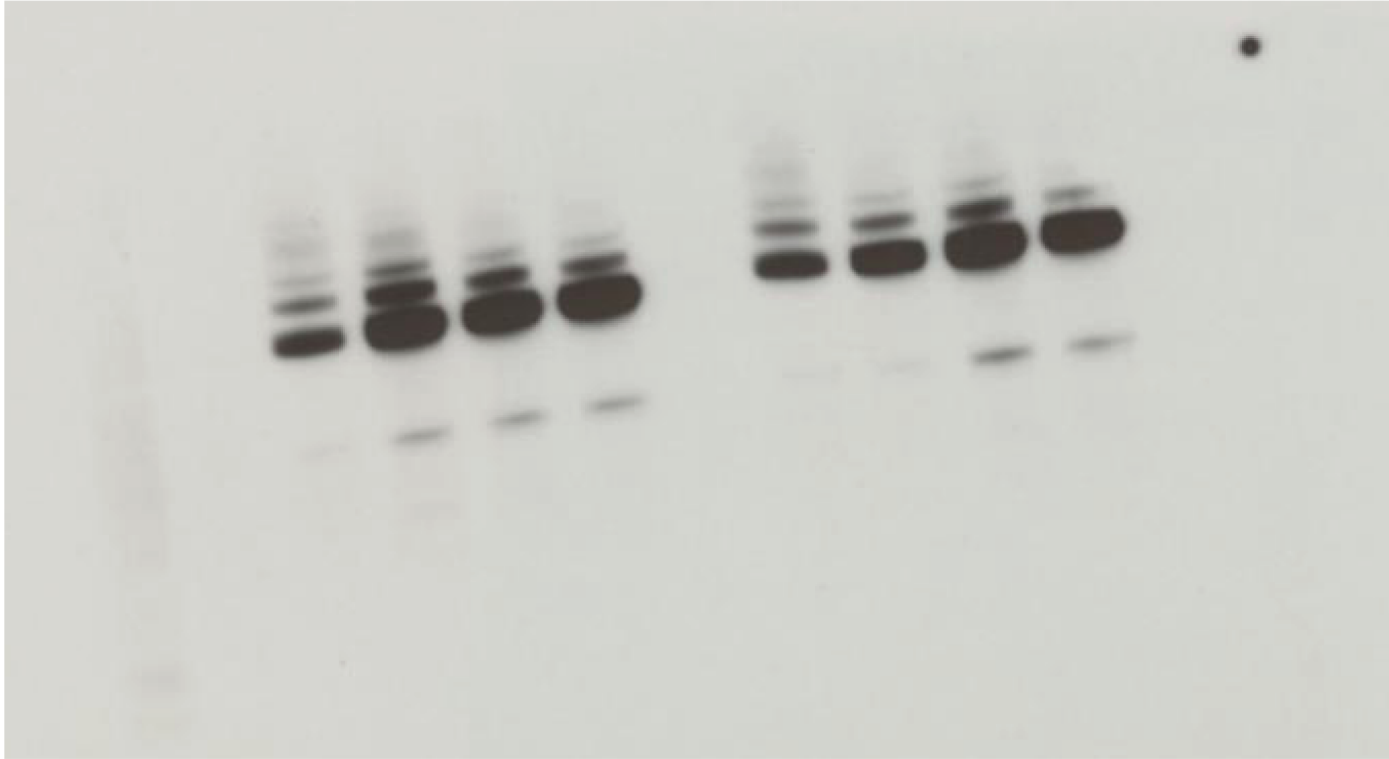

slc15a4<sup>+/+</sup>

slc15a4<sup>-/-</sup>

p-IRAK1

M 0' 15' 30' 60' 120' 0' 15' 30' 60' 120'

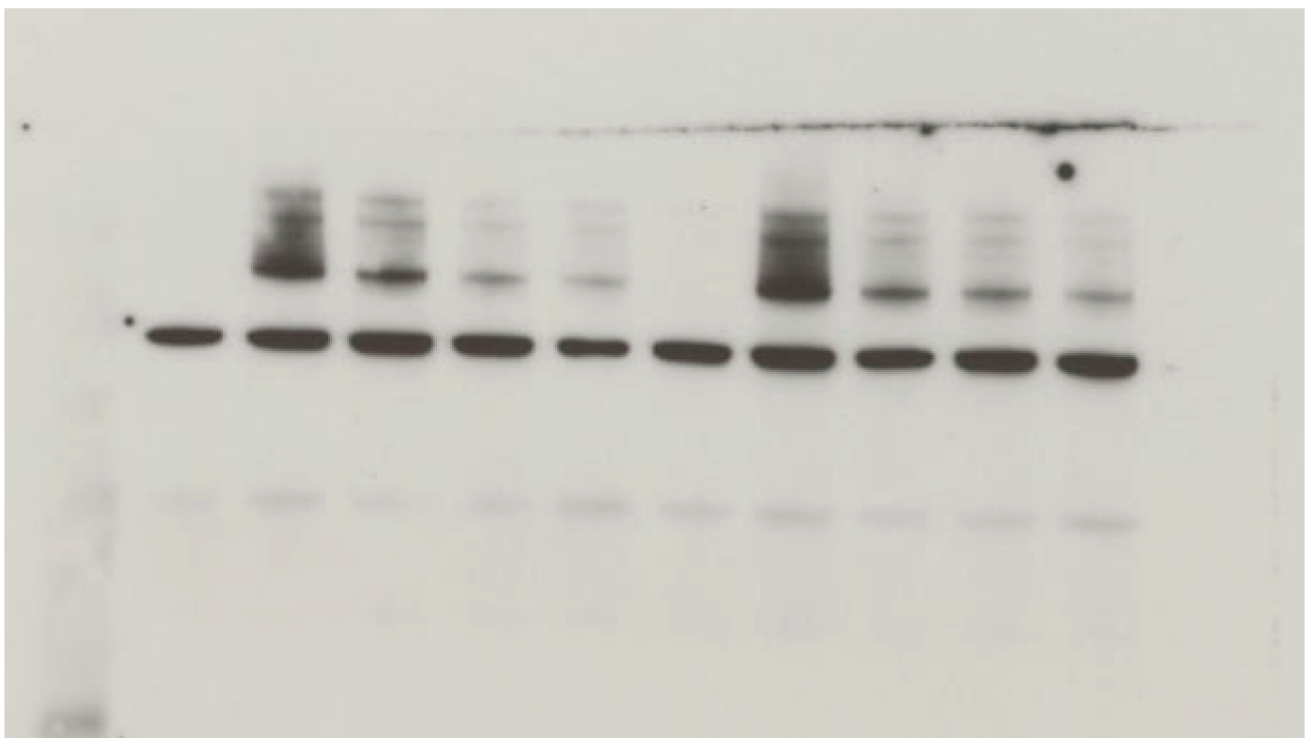

Figure 2F

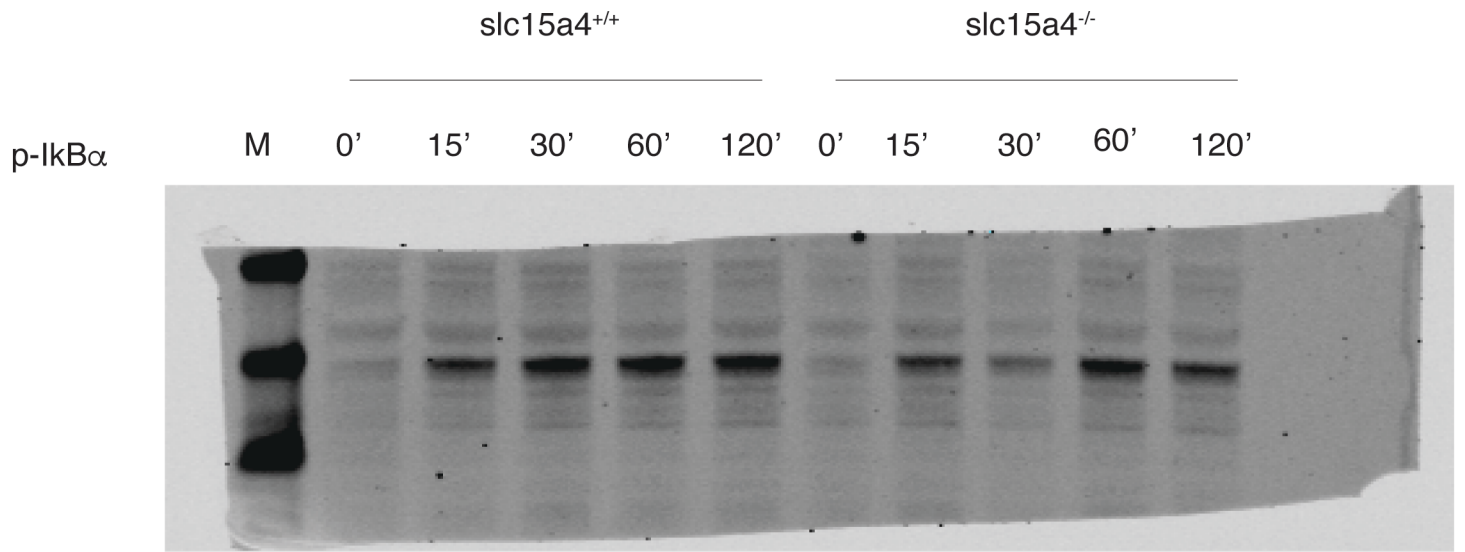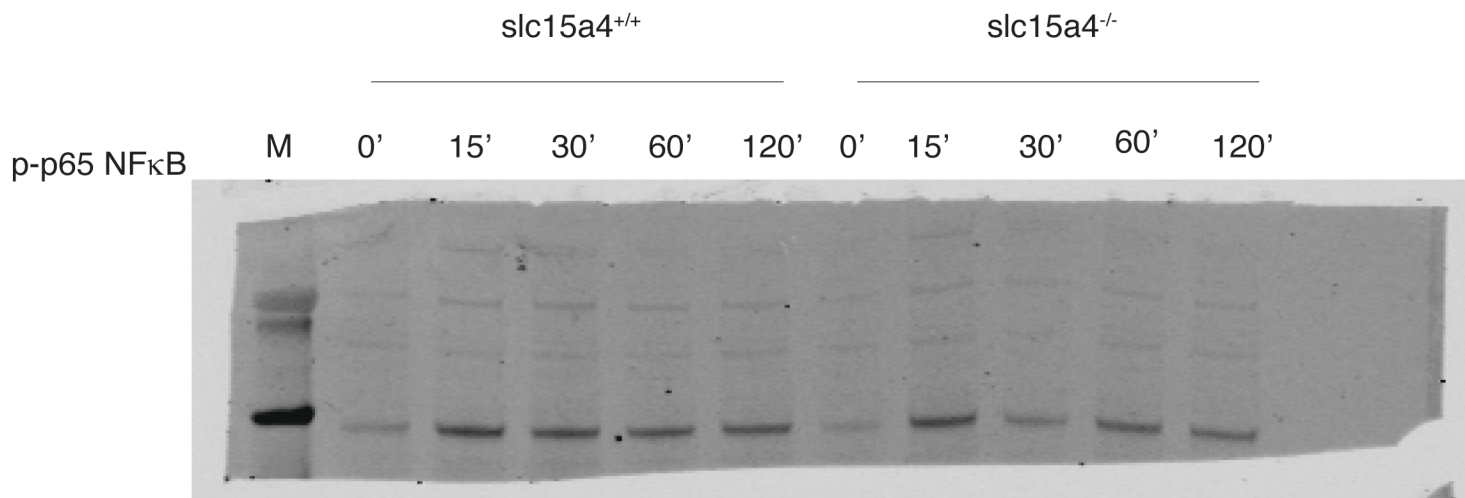

Figure 2F

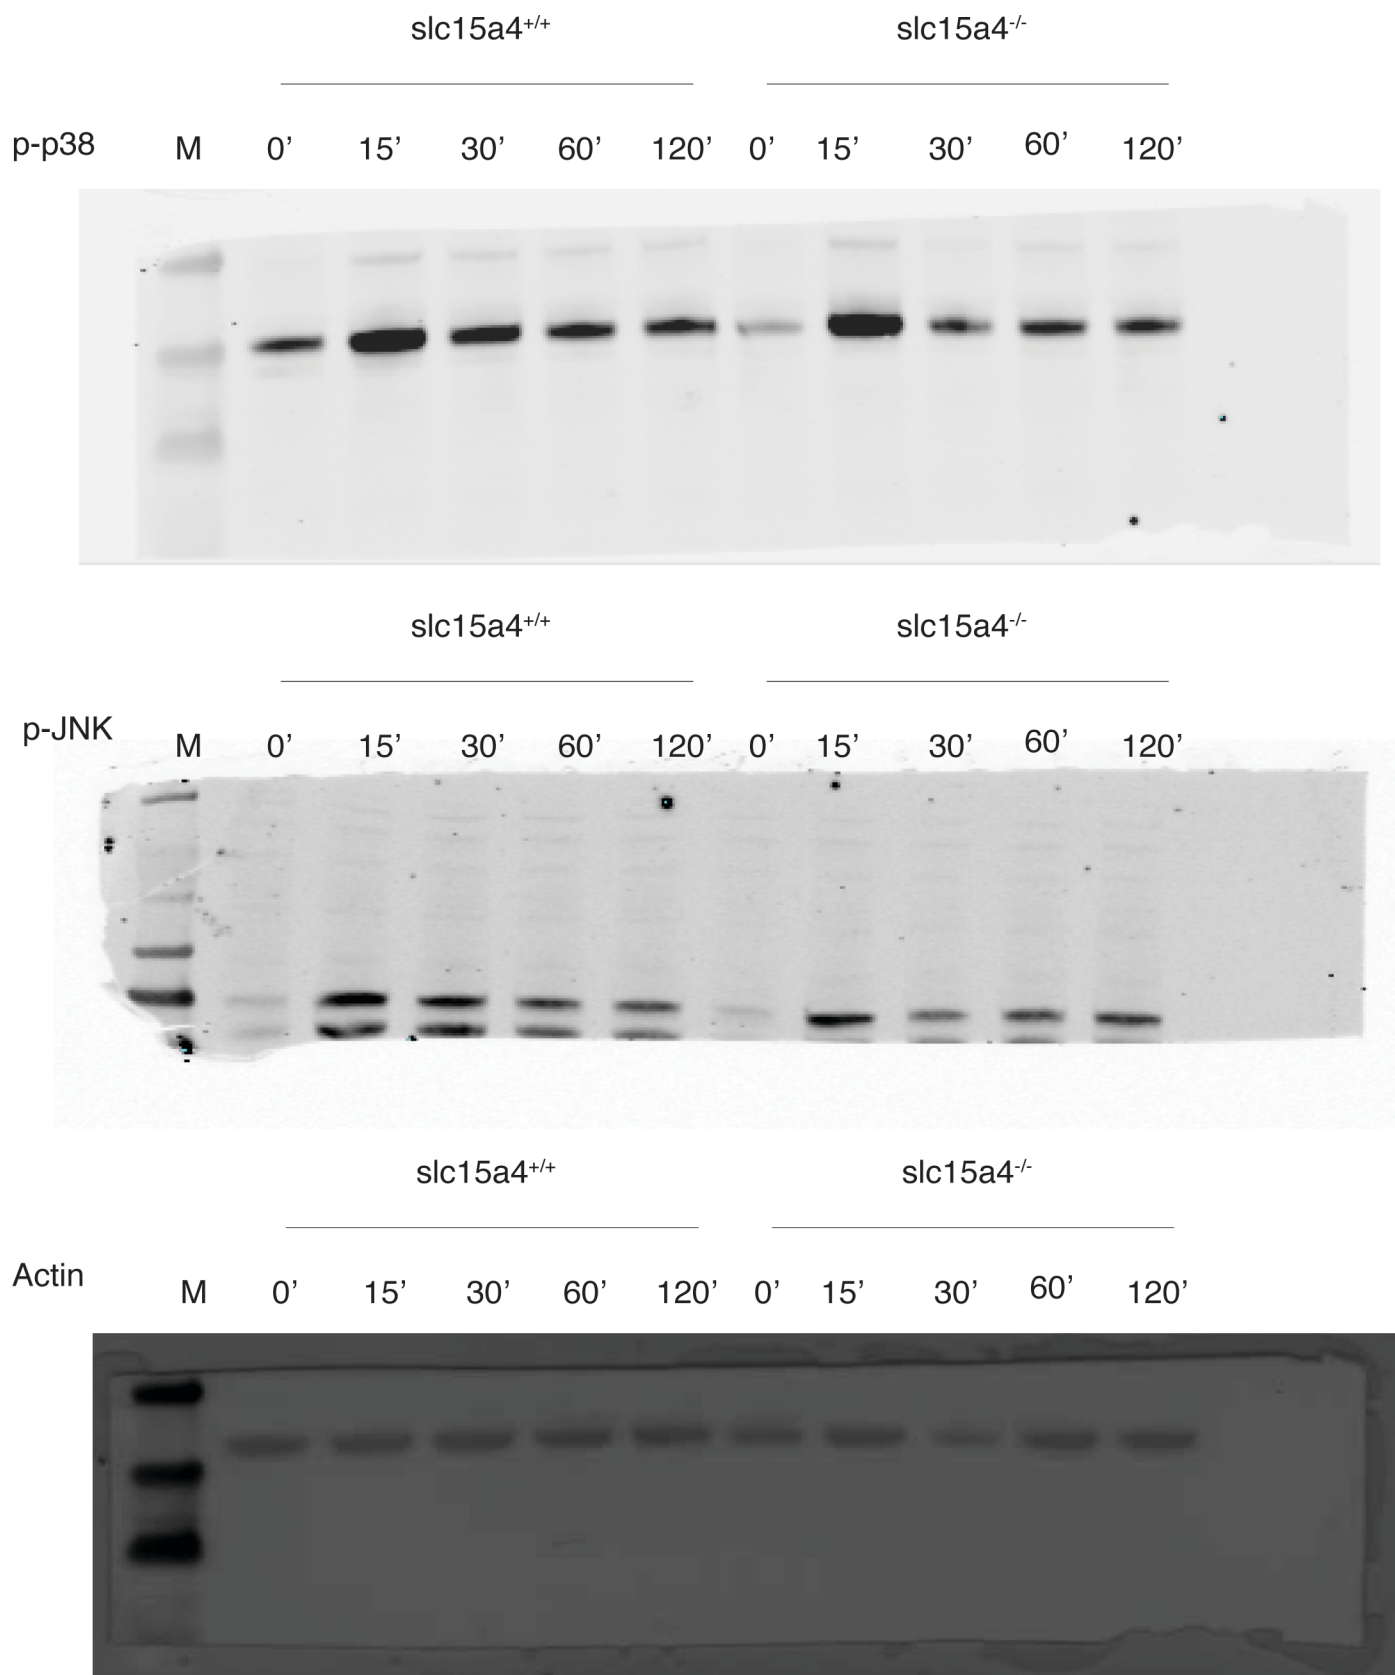

Figure 2F

| p-IRAK4 | M | slc15a4 <sup>+/+</sup> |     |     |     |     | slc15a4 <sup>-/-</sup> |     |     |     |     | R848 (1μg/ml)<br>CHQ (5μM) |
|---------|---|------------------------|-----|-----|-----|-----|------------------------|-----|-----|-----|-----|----------------------------|
|         |   | -                      | +   | +   | +   | +   | -                      | +   | +   | +   | +   |                            |
|         |   | 0'                     | 15' | 30' | 15' | 30' | 0'                     | 15' | 30' | 15' | 30' |                            |

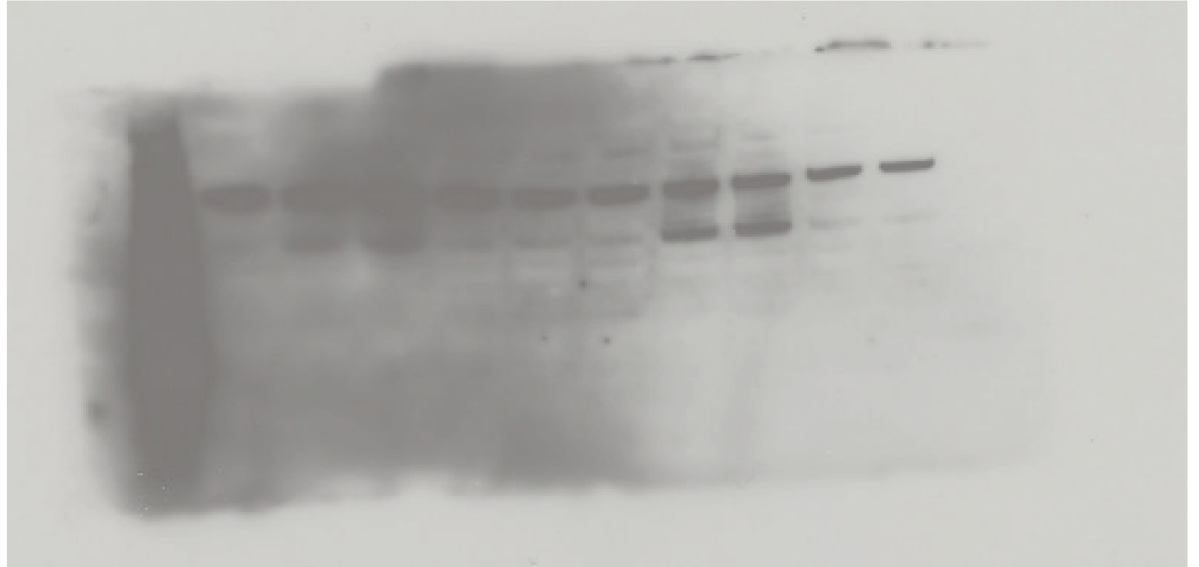

| p-IRAK1 | M | slc15a4 <sup>+/+</sup> |     |     |     |     | slc15a4 <sup>-/-</sup> |     |     |     |     | R848 (1μg/ml)<br>CHQ (5μM) |
|---------|---|------------------------|-----|-----|-----|-----|------------------------|-----|-----|-----|-----|----------------------------|
|         |   | -                      | +   | +   | +   | +   | -                      | +   | +   | +   | +   |                            |
|         |   | 0'                     | 15' | 30' | 15' | 30' | 0'                     | 15' | 30' | 15' | 30' |                            |

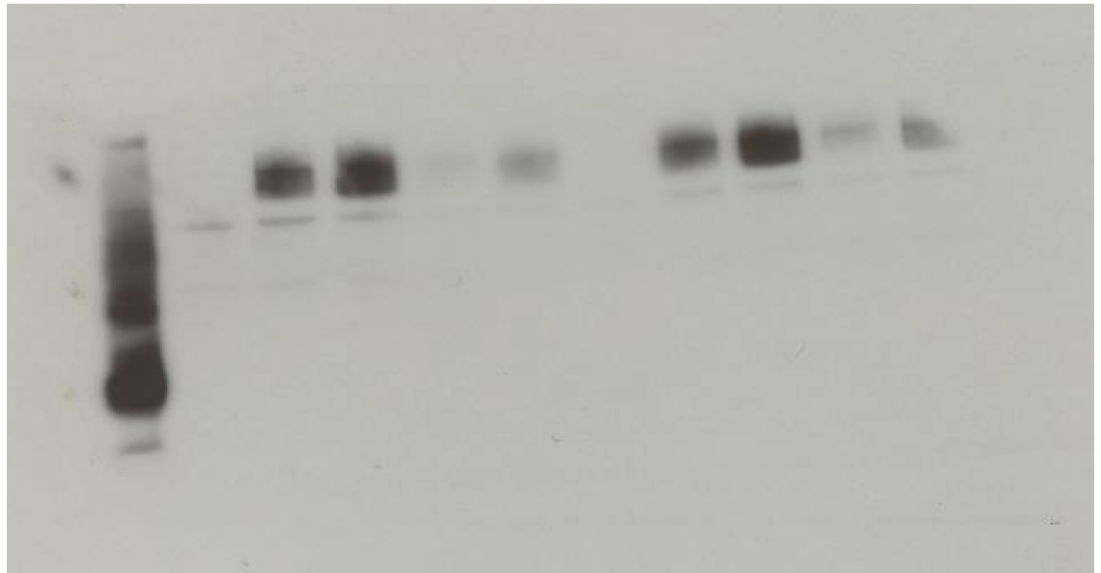

Figure 2G

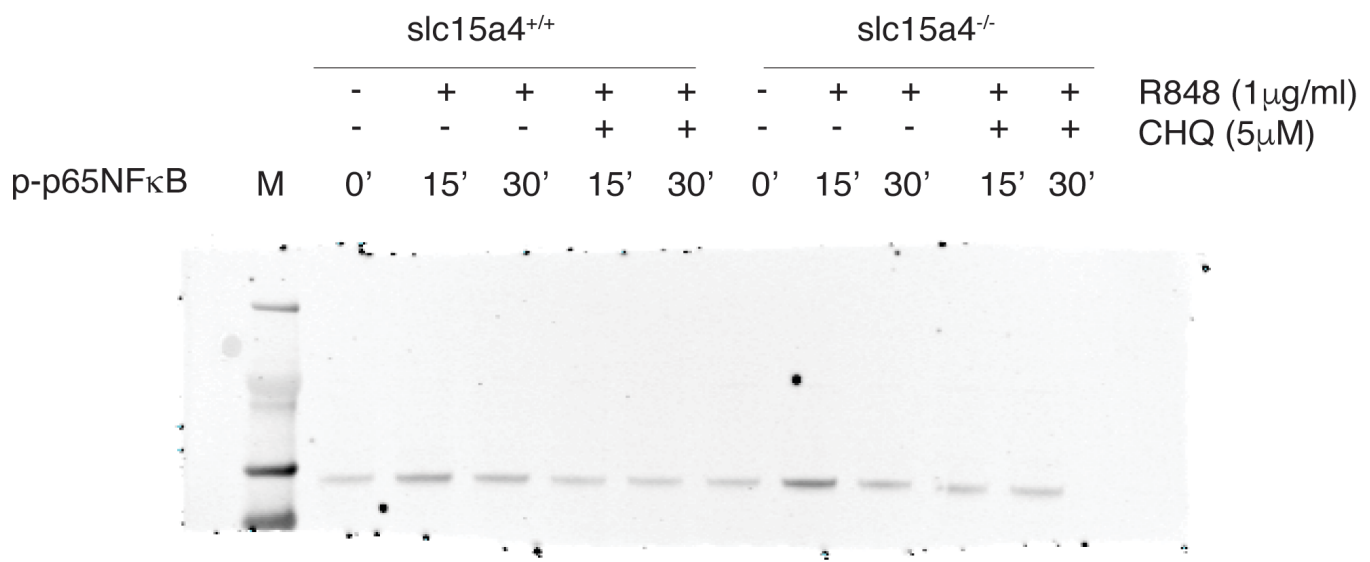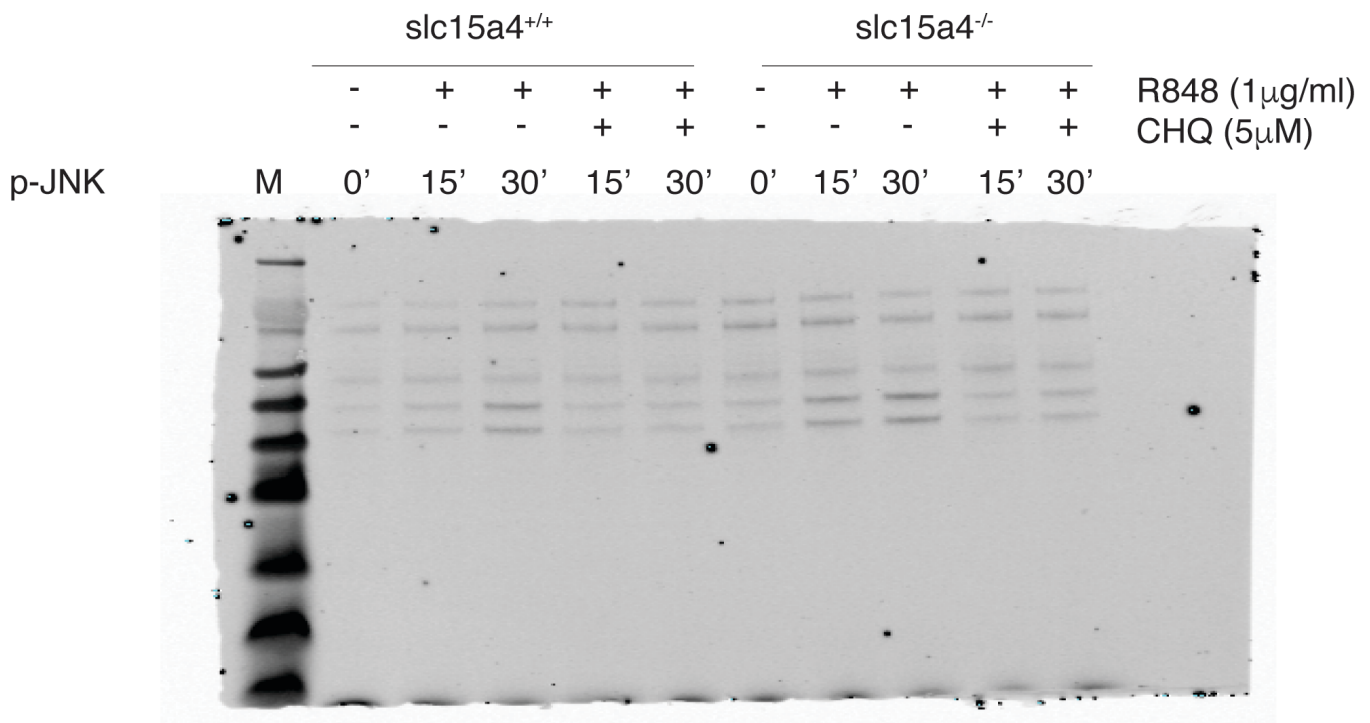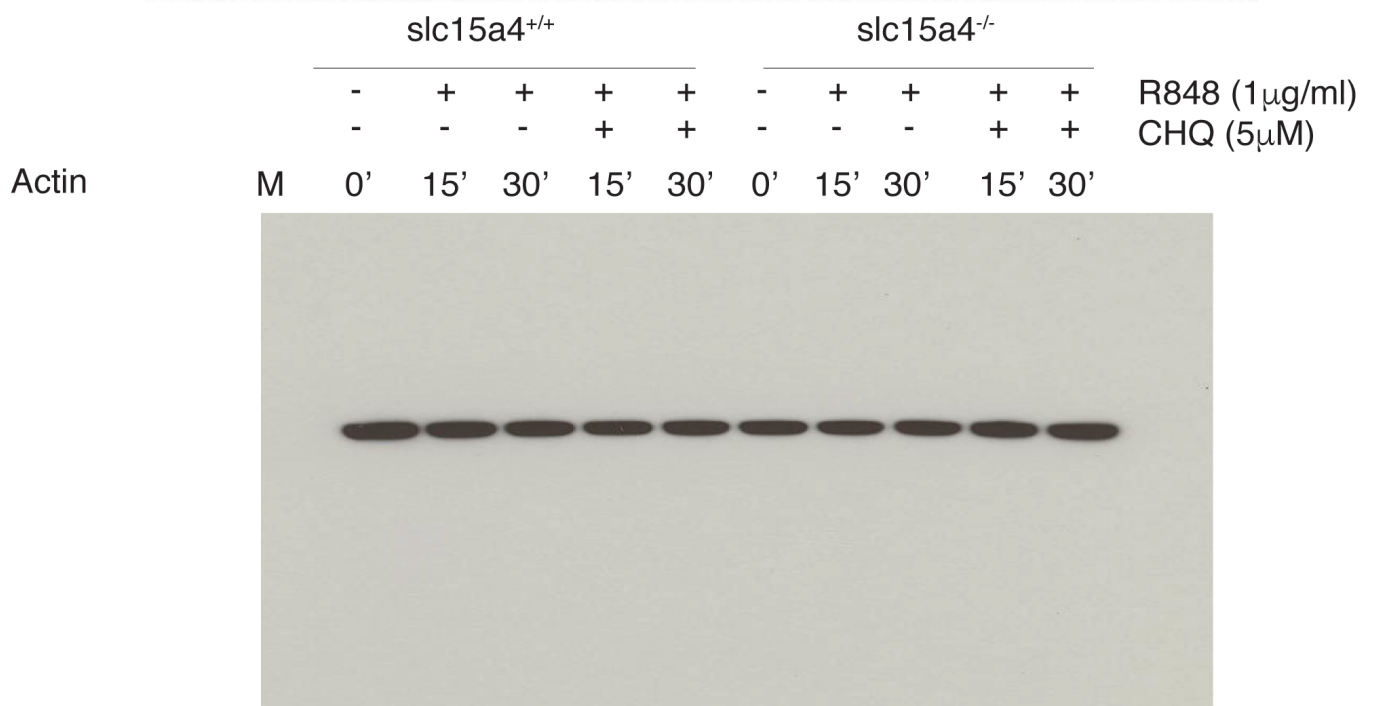

Figure 2G
